# Supplementary material for: Intraoperative Rotational Kinematics and Its Influence on Postoperative Clinical Outcomes Differ According to Age in Unicompartmental Knee Arthroplasty
Source: Research Square preprint supplement (doi:10.21203/rs.3.rs-275676/v1), 2021-03-05

Table 5 Correlation coefficients between intraoperative tibial internal rotation and postoperative clinical scores in nonelderly patients (aged <75 years)


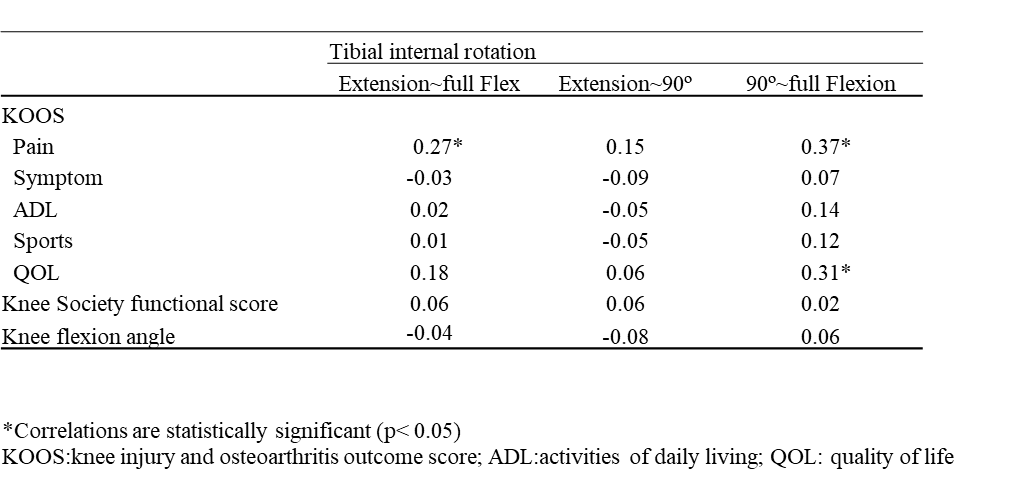

Supplement: Supplementary file 1 [file 6b6e36dd9c20f3b7f3a9bb3b.docx]
